# Supplementary material for: Different csrA Expression Levels in C versus K-12 E. coli Strains Affect Biofilm Formation and Impact the Regulatory Mechanism Presided by the CsrB and CsrC Small RNAs
Source: MDPI journal article supplement (doi:10.3390/microorganisms9051010), 2021-05-07
Supplement: s1 [file s1]

# **Different *csrA* Expression Levels in C versus K-12 *E. coli* Strains Affect Biofilm Formation and Impact the Regulatory Mechanism Presided by the CsrB and CsrC Small RNAs**

This file contains:

Table S1. Oligonucleotides

Figure S1. Growth curves of *csrA* mutants

Figure S2. Activity of the *pgaABCD* operon promoter

Figure S3. Transcription of *csrA* locus in *csrA::kan* mutants and characterization of CsrB sRNA

**Table S1. Oligonucleotides**

| Name   | Sequence                                                                   |
|--------|----------------------------------------------------------------------------|
| FG2524 | AGCGCCTTGTAAGACTTCGCGAAAAAGACGATTCTATCTTCGTCGACAGGTGTAGGC<br>TGGAGCTGCTTCG |
| FG2525 | AGGGAGCACTGTATTACAGCGCTCCCGGTTTCGTTTCGCAGCATTCCAGCATTCCGGG<br>GATCCGTCGACC |
| FG2530 | CGTTGTCTGACTCCCTGTCGAC                                                     |
| FG2531 | GCTCCCTGCTCATCCTTGACAACTTT                                                 |
| FG2568 | CCGGACGTTTGTCTTCCTG                                                        |
| FG2585 | AAAATGTGCAAATACTGATGGCGGTTGATTGTTTGTAAAGCAAAGGCGTGTGTAG<br>GCTGGAGCTGCTT   |
| FG2586 | TGCGGCGGAATCTAACAGAAAGCAAGCAAAGAAAAAAGGCGACAGATTAACATAT<br>GAATATCCTCCTTAG |
| FG2624 | CGGGATACAGAGAGACCCGACTCTTTTAATCTTTCAAGGAGCAAAGAATGATTCCGG<br>GGATCCGTCGACC |
| FG2625 | CTCACCGATAAAGATGAGACGCGGAAAGATTAGTAACTGGACTGCTGGGATGTAGG<br>CTGGAGCTGCTTCG |
| FG2647 | CTAATACGACTCACTATAGGGCGCCAATACGTACCTGGTTG                                  |
| FG2753 | ATGCGATATCCTACTTCGCGGCTACGACC                                              |
| FG3151 | CGAAAGCTTTAATCTTTCAAGGAGGAAAG                                              |
| FG3152 | CGTGGATCCCGTCTCACCGATAAAGATG                                               |
| PL101  | TGTCGTCAGCTCGTGTCGTGA                                                      |
| PL102  | ATCCCCACCTTCCTCCGGT                                                        |
| PL191  | ATGCTGATTCTGACTCGTCGAG                                                     |
| PL208  | GGGAGTCAGACAACGAAGTG                                                       |

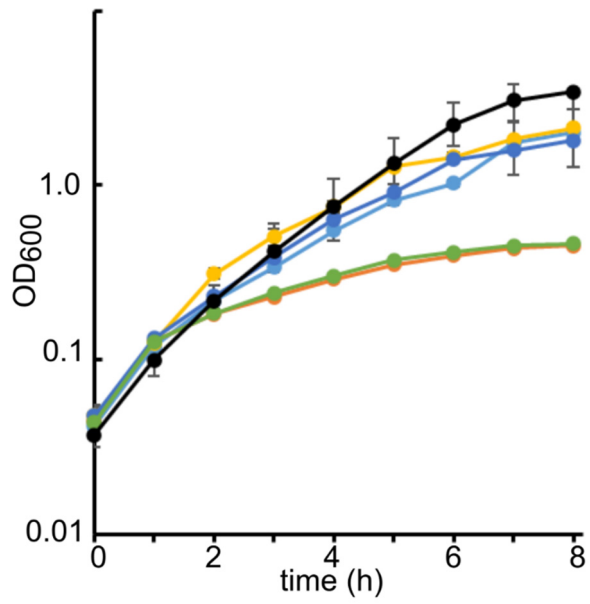

**Figure S1. Growth curves of *csrA* mutants.** Growth at 37 °C in M9-LG monitored by measuring the OD<sub>600</sub> of cultures of the strains indicated in the Figure. *E. coli* C: *csrA*<sup>+</sup>, C-1a (black curve);  $\Delta$ *csrA*, C-5939 (light blue curve); *csrA::kan*, C-5741, (green, orange and blue curves); *E. coli* K-12: MG1655 *csrA::kan* (yellow curve). Three C-5741 independent cultures were analysed in this experiment.

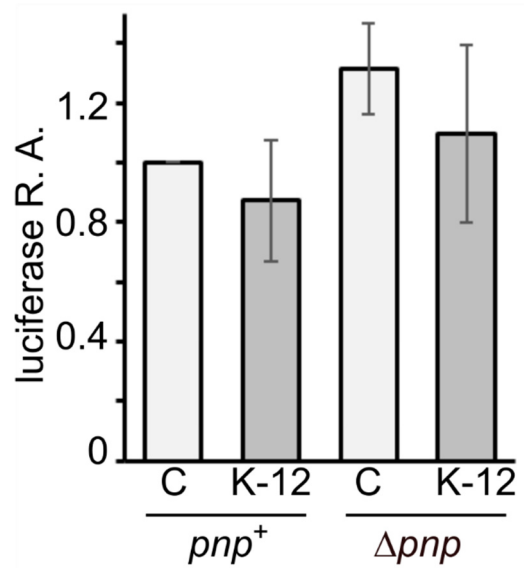

**Figure S2. Activity of the *pgaABCD* operon promoter.** Luciferase relative activity (R.A.) with respect to *E. coli* C wt strain. Results are the average of three determinations on independent cultures of the strains: *E. coli* C C-1a ( $pnp^+$ ), C-5691 ( $\Delta pnp$ ); *E. coli* K-12 MG1655 ( $pnp^+$ ), KG-211 ( $\Delta pnp$ ). All strains carried plasmid p $\Delta$ Lpga, which carries the *pgaABCD* promoter upstream of the luciferase gene [23]. Differences in luciferase R.A. with respect to the C-1a are not statistically significant according to t-test.

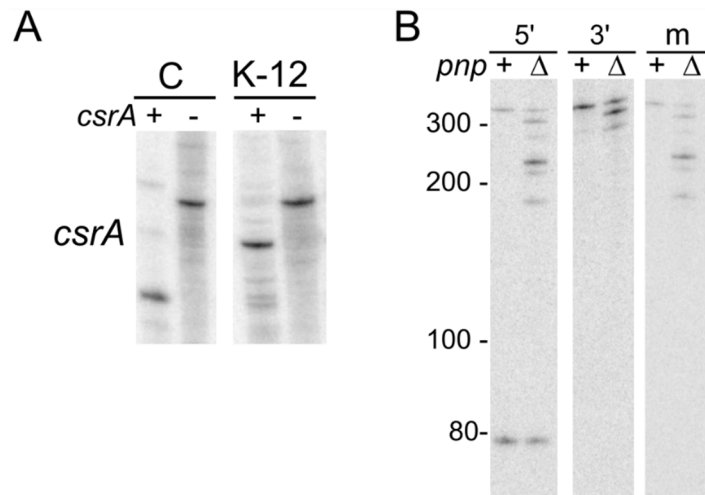

**Figure S3. Transcription of *csrA* locus in *csrA::kan* mutants and characterization of CsrB sRNA.** Northern blotting of RNA extracted from cultures grown in M9-LG to OD<sub>600</sub> = 0.8 at 37 °C. RNA samples (10 µg) were loaded on 6% polyacrylamide-urea gel, blotted onto a nylon membrane, and hybridized with the CSRA riboprobe (**A**) or radiolabelled oligonucleotides specific for different regions of the CsrB sRNA (FG2530, CsrB 5'-end; FG2531, CsrB 3'-end; PL208, CsrB internal region, m). (**B**). **A.** RNA extracted from cultures of *E. coli* C C-1a (+, *csrA*<sup>+</sup>), C-5741 (-, *csrA::kan*), and *E. coli* K-12 MG1655 (+, *csrA*<sup>+</sup>) and its isogenic *csrA::kan* mutant (-). **B.** RNA extracted from cultures of C-1a (+, *pnp*<sup>+</sup>) and C-5691 (Δ, Δ*pnp*), KG-294 (Δ*csrA pnp*<sup>+</sup>). The position and MW (in nt) of bands of the Low-range ssRNA ladder (NEB) is reported on the left.
